# Supplementary material for: A taxonomic framework for cable bacteria and proposal of the candidate genera Electrothrix and Electronema
Source: PubMed Central journal article supplement — Syst Appl Microbiol. 2016 Jul;39(5):297–306. doi: 10.1016/j.syapm.2016.05.006 (PMC4958695; doi:10.1016/j.syapm.2016.05.006), 2016-07

## Supplementary Tables

**Table S1.** GenBank accession numbers and RDP<sup>1</sup> sequence identifiers (locus) for 16S rRNA gene sequences of reference species used in the phylogenetic tree calculations of Figure 1A.

| Species                              | Strain    | GenBank Acc. No. | RDP Sequence Identifier |
|--------------------------------------|-----------|------------------|-------------------------|
| <i>Desulfobacterium corrodens</i>    | IS4       | AY274450         | S000405328              |
| <i>Desulfobulbus alkaliphilus</i>    | APS1      | HM750216         | S002232697              |
| <i>Desulfobulbus elongatus</i>       | DSM 2908  | X95180           | S000126615              |
| <i>Desulfobulbus japonicus</i>       | DSM 18378 | AB110550         | S000469517              |
| <i>Desulfobulbus japonicus</i>       | DSM 18378 | AB110549         | S000469516              |
| <i>Desulfobulbus mediterraneus</i>   | 86FS1     | AF354663         | S000392134              |
| <i>Desulfobulbus mediterraneus</i>   | NA62      | AJ866934         | S000570998              |
| <i>Desulfobulbus propionicus</i>     | DSM 2032  | AY548789         | S000485873              |
| <i>Desulfobulbus propionicus</i>     | DSM 2032  | CP002364         | S004065689              |
| <i>Desulfobulbus propionicus</i>     | DSM 2032  | CP002364         | S004065690              |
| <i>Desulfobulbus rhabdoformis</i>    | M16       | U12253           | S000437114              |
| <i>Desulfobulbus rhabdoformis</i>    | Mic13c08  | AB546247         | S002165016              |
| <i>Desulfobulbus rhabdoformis</i>    | Mic5c02   | AB546248         | S002165017              |
| <i>Desulfocapsa sulfexigens</i>      | DSM 10523 | CP003985         | S004066753              |
| <i>Desulfocapsa sulfexigens</i>      | DSM 10523 | CP003985         | S004066754              |
| <i>Desulfocapsa sulfexigens</i>      | DSM 10523 | CP003985         | S004066755              |
| <i>Desulfocapsa sulfexigens</i>      | SB164P1   | Y13672           | S000130725              |
| <i>Desulfocapsa thiozymogenes</i>    | DSM 7269  | X95181           | S000128257              |
| <i>Desulfofustis glycolicus</i>      | PerGlyS   | X99707           | S000381437              |
| <i>Desulfopila aestuarii</i>         | MSL86     | AB110542         | S000469515              |
| <i>Desulforhopalus singaporensis</i> | S'pore T1 | AF118453         | S000429262              |
| <i>Desulforhopalus vacuolatus</i>    | ltk10     | L42613           | S000435986              |
| <i>Desulfotalea arctica</i>          | LSv514    | AF099061         | S000428874              |
| <i>Desulfotalea psychrophila</i>     | LSv54     | AF099062         | S000428875              |
| <i>Desulfotalea psychrophila</i>     | LSv54     | CR522870         | S002287357              |
| <i>Desulfotalea psychrophila</i>     | LSv54     | CR522870         | S002287793              |
| <i>Desulfotalea psychrophila</i>     | LSv54     | CR522870         | S002288923              |
| <i>Desulfotalea psychrophila</i>     | LSv54     | CR522870         | S002289484              |
| <i>Desulfotalea psychrophila</i>     | LSv54     | CR522870         | S002290733              |
| <i>Desulfotalea psychrophila</i>     | LSv54     | CR522870         | S002291210              |
| <i>Desulfotalea psychrophila</i>     | LSv54     | CR522870         | S004067690              |
| <i>Desulfovibrio marinus</i>         | E-2       | DQ365924         | S000649379              |
| <i>Desulfurivibrio alkaliphilus</i>  | AHT2      | EF422413         | S000824852              |
| <i>Desulfurivibrio alkaliphilus</i>  | AHT2      | CP001940         | S002290083              |
| <i>Desulfurivibrio alkaliphilus</i>  | AHT2      | CP001940         | S004063855              |
| Delta proteobacterium                | MLMS-1    | AY459365         | S000358719              |

<sup>1</sup> Ribosomal Database Project

**Table S2.** Metadata of DsrAB sequences used for reconstructing the phylogeny of cable bacteria and closely related *Desulfobulbus* species. DsrAB sequences of *D. elongatus*, *D. japonicus*, and *D. mediterraneus* were retrieved from the Integrated Microbial Genomes (IMG) database (V.M. Markowitz, I.-M.A. Chen, K. Palaniappan, K. Chu, E. Szeto, Y. Grechkin, A. Ratner, B. Jacob, J. Huang, P. Williams, M. Huntemann, I. Anderson, K. Mavromatis, N.N. Ivanova, N.C. Kyrpides, IMG; the integrated microbial genomes database and comparative analysis system, Nucleic Acids Res., 40 (2012) D115-D122.) and are shown with the corresponding IMG gene id's (marked with asterisks). Abbreviation: aa, amino acids.

| Cable filament/species                             | Used for                        |                              |             | DsrA                         |                              |             | DsrB                         |  |  |
|----------------------------------------------------|---------------------------------|------------------------------|-------------|------------------------------|------------------------------|-------------|------------------------------|--|--|
|                                                    | DsrAB tree topology calculation | Accession number (Locus tag) | Length [aa] | Comment                      | Accession number (Locus tag) | Length [aa] | Comment                      |  |  |
| " <i>Candidatus</i> Electrothrix communis A1"      | No                              | -                            | -           | missing                      | KU844004                     | 379         | full length                  |  |  |
| " <i>Candidatus</i> Electrothrix marina A2"        | Yes                             | KU844005                     | 426         | full length                  | KU844006                     | 362         | missing middle fragment      |  |  |
| " <i>Candidatus</i> Electrothrix marina A3"        | No                              | KU844007                     | 329         | N- and C- termini incomplete | KU844008                     | 264         | N- and C- termini incomplete |  |  |
| " <i>Candidatus</i> Electrothrix marina A5"        | Yes                             | KU844009                     | 409         | N- and C- termini incomplete | KU844010                     | 379         | full length                  |  |  |
| " <i>Candidatus</i> Electrothrix aarhusiensis MCF" | Yes                             | KU844014                     | 426         | full length                  | KU844015                     | 379         | full length                  |  |  |
| " <i>Candidatus</i> Electronema nielsenii F1"      | No                              | -                            | -           | missing                      | -                            | -           | missing                      |  |  |
| " <i>Candidatus</i> Electronema palustris F3"      | No                              | -                            | -           | missing                      | KU844011                     | 196         | C- terminus incomplete       |  |  |
| " <i>Candidatus</i> Electronema palustris F4"      | Yes                             | KU844012                     | 426         | full length                  | KU844013                     | 379         | full length                  |  |  |
| " <i>Candidatus</i> Electronema nielsenii F5"      | No                              | -                            | -           | missing                      | -                            | -           | missing                      |  |  |
| " <i>Candidatus</i> Electrothrix communis N2"      | No                              | KU844016                     | 329         | N- terminus incomplete       | KU844017                     | 379         | full length                  |  |  |
| " <i>Candidatus</i> Electrothrix communis N3"      | No                              | -                            | -           | missing                      | KU844018                     | 379         | full length                  |  |  |
| " <i>Candidatus</i> Electrothrix japonica TB"      | Yes                             | KU844019                     | 426         | full length                  | KU844020                     | 379         | full length                  |  |  |
| " <i>Candidatus</i> Electrothrix communis US1"     | Yes                             | KU844021                     | 426         | full length                  | KU844022                     | 379         | full length                  |  |  |
| " <i>Candidatus</i> Electrothrix communis US2"     | No                              | KU844023                     | 246         | C- terminus incomplete       | KU844024                     | 354         | N- terminus incomplete       |  |  |
| " <i>Candidatus</i> Electrothrix communis US4"     | Yes                             | KU844025                     | 426         | full length                  | KU844026                     | 379         | full length                  |  |  |
| " <i>Candidatus</i> Electrothrix communis US5"     | Yes                             | KU844027                     | 409         | N- terminus incomplete       | KU844028                     | 379         | full length                  |  |  |
| <i>Desulfobulbus propionicus</i>                   | Yes                             | CP002364, Despr_2940         | 426         | full length                  | CP002364, Despr_2941         | 379         | full length                  |  |  |
| <i>Desulfobulbus rhabdoformis</i>                  | Yes                             | AJ250473                     | 379         | N- terminus incomplete       | AJ250473                     | 379         | full length                  |  |  |
| <i>Desulfobulbus elongatus</i>                     | Yes                             | 2558014283*                  | 428         | full length                  | 2558014284*                  | 379         | full length                  |  |  |
| <i>Desulfobulbus japonicus</i>                     | Yes                             | 2525724744*                  | 428         | full length                  | 2525724745*                  | 379         | full length                  |  |  |
| <i>Desulfobulbus mediterraneus</i>                 | Yes                             | 2523914993*                  | 428         | full length                  | 2523914992*                  | 379         | full length                  |  |  |

**Table S3.** GenBank-, VAMPS- and SRA accession numbers and read names of 16S rRNA gene sequences classified as cable bacteria as shown in Figure 3.

| <b>Classified to</b>                       | <b>Accession number or read name</b>           |          |
|--------------------------------------------|------------------------------------------------|----------|
| " <i>Candidatus</i> Electrothrix marina"   | JX091065                                       |          |
|                                            | JX091056                                       |          |
|                                            | JX091026                                       |          |
|                                            | KP265606                                       |          |
|                                            | SRR1237828.8534                                |          |
|                                            | SRR1237828.19412                               |          |
|                                            | SRR1239351.13008                               |          |
|                                            | SRR1239351.19032                               |          |
|                                            | SRR1239352.6071                                |          |
|                                            | SRP001224.FjaYyyyy                             |          |
|                                            | SRP001224.FjeYyyyy.1                           |          |
|                                            | " <i>Candidatus</i> Electrothrix aarhusiensis" | KJ562791 |
|                                            |                                                | KJ562774 |
| HG004404                                   |                                                |          |
| KCK_LSM_Bv6.FYDYyyyy                       |                                                |          |
| SRP018043.Sr0SRR66                         |                                                |          |
| SRP018043.Sr0SRR67                         |                                                |          |
| SRP018043.Sr0SRR68                         |                                                |          |
| SRP018043.Sr0SRR69                         |                                                |          |
| SRP018043.Sr0SRR10                         |                                                |          |
| SRP018043.Sr0SRR12                         |                                                |          |
| SRP018043.Sr0SRR13                         |                                                |          |
| SRP018043.Sr0SRR16                         |                                                |          |
| SRP018043.Sr0SRR17                         |                                                |          |
| SRP001224.FjjYyyyy                         |                                                |          |
| SRP001224.FjfYyyyy                         |                                                |          |
| SRP001224.FjkYyyyy                         |                                                |          |
| SRP001224.FjvYyyyy                         |                                                |          |
| SRP001224.FcxYyyyy                         |                                                |          |
| SRP001224.FjuYyyyy                         |                                                |          |
| SRP001224.FjpYyyyy                         |                                                |          |
| SRP048832.FqpYyyyy                         |                                                |          |
| SRP001219.FhkYyyyy                         |                                                |          |
| " <i>Candidatus</i> Electrothrix japonica" | KJ562804                                       |          |
|                                            | KJ562801                                       |          |
|                                            | KJ562800                                       |          |
|                                            | KJ562733                                       |          |
|                                            | KP265514                                       |          |
|                                            | JX091073                                       |          |
|                                            | JX091064                                       |          |
|                                            | JX091057                                       |          |
|                                            | HG004406                                       |          |
|                                            | HG004418                                       |          |
|                                            | GQ249497                                       |          |
|                                            | JF268345                                       |          |
|                                            | JF268368                                       |          |
|                                            | JF268348                                       |          |
|                                            | SRR1055216.453                                 |          |

**Table S3.** continued

"*Candidatus Electrothrix japonica*", continued

SRR1055216.9384  
SRR1055237.683  
SRR1145124.379  
SRR1145124.1380  
SRR1145124.1597  
SRR1145124.1994  
SRR1145124.2329  
SRR1145124.2432  
SRR1145124.2548  
SRR1145124.2901  
SRR1145124.2966  
SRR1145124.3860  
SRR1145124.4182  
SRR1145124.4418  
SRR1145124.4529  
SRR1145631.3034  
SRP018043.Sr0SRR18  
SRP001224.FjiYyyyy  
SRP001224.FjcYyyyy  
SRP001224.FcqYyyyy  
SRP001224.FdjYyyyy  
SRP001224.FjxYyyyy  
SRP001224.FijYyyyy  
SRP001224.FiyYyyyy  
SRP001224.FwfYyyyy  
SRP001224.FddYyyyy.1  
SRP001224.FyeYyyyy  
SRP048832.FffYyyyy  
SRP048832.FfkYyyyy  
SRP048832.FmhYyyyy

---

"*Candidatus Electrothrix communis*"

KJ562789  
KJ562741  
KJ021898  
KJ021897  
KJ021896  
KJ021895  
KJ021894  
JX091070  
JX091067  
JX091062  
JX091054  
JX091052  
JX091041  
JX091028  
JX091025  
HG004415  
HG004414  
HG004413  
HG004412  
HG004411  
HG004410  
HG004409  
HG004408

**Table S3.** continued

"*Candidatus Electrothrix communis*", continued

HG004407  
HG004405  
HG004425  
HG004420  
HG004419  
HG004417  
HG004416  
SRR1055238.1736  
SRR1055238.1755  
SRR1055238.1979  
SRR1055238.2280  
SRR1055238.2338  
SRR1303666.24062  
SRR1303671.20531  
SRR2002304.32048  
SRR2002305.54802  
SRR2002309.44990  
SRP018043.Sr0SRR65  
SRP018043.Sr0SRR63  
SRP001224.FcyYyyyy

---

"*Candidatus Electronema palustris*"

KJ562812  
FQ658891  
FQ658831  
GU208270  
SRR1303674.28921  
SRR1303689.2257

---

Unclassified<sup>1</sup>

KF771007  
JX091072  
JX091071  
JX091053  
SRP001219.FhpYyyyy  
JX091066  
JX091061  
JX091048  
JX091047  
JX091046  
SRR1237828.11267  
SRR1237828.13162  
SRR1239351.12358  
SRP001224.FjwYyyyy  
KF771006  
KJ021903  
JF268391  
GU302481  
GU302491  
AJ535251  
KF741578  
KC682614  
FJ264759  
AJ535236  
AF420335  
GQ356972  
AM176869

**Table S3.** continued

Unclassified<sup>1</sup>, continued

AM745164  
FJ264778  
FN554128  
AM745147  
KF616777  
KF616785  
FN554120  
FJ813528  
AB013265  
AM745212  
FR852964  
AM745158  
GQ357024  
AF354166  
AM745146  
JN256011  
KF616796  
KF616762  
GU369890  
FM179901  
FJ905682  
KF440309  
GU369922  
JN662193  
AY542555  
AB806709  
AB188784  
FN396704  
FN396626  
JN662051  
FN396640  
FN396662  
AB100011

---

<sup>1</sup> not assigned to one of the candidate species but within the cable-bacteria group

**Table S4.** Nucleotide identities (upper right triangle) and corresponding nucleotide alignment lengths (lower left triangle) of *dsrAB* genes of cable bacteria and closely related *Desulfobulbus* species. Cable bacteria of the same species are color coded: “*Candidatus Electrothrix communis*”, violet; “*Candidatus Electrothrix marina*”, blue; “*Candidatus Electronema palustris*”, green. Abbreviation: bp, base pairs.

|                                                    | Nucleotide identity                           |                                               |                                               |                                                |                                                |                                                |                                                |                                                |                                               |                                             |                                             |                                                |                                               |                                             |                                                      |       |       |       |   |
|----------------------------------------------------|-----------------------------------------------|-----------------------------------------------|-----------------------------------------------|------------------------------------------------|------------------------------------------------|------------------------------------------------|------------------------------------------------|------------------------------------------------|-----------------------------------------------|---------------------------------------------|---------------------------------------------|------------------------------------------------|-----------------------------------------------|---------------------------------------------|------------------------------------------------------|-------|-------|-------|---|
|                                                    | " <i>Candidatus Electrothrix communis</i> A1" | " <i>Candidatus Electrothrix communis</i> N2" | " <i>Candidatus Electrothrix communis</i> N3" | " <i>Candidatus Electrothrix communis</i> USS" | " <i>Candidatus Electrothrix communis</i> US1" | " <i>Candidatus Electrothrix communis</i> US2" | " <i>Candidatus Electrothrix communis</i> US4" | " <i>Candidatus Electrothrix communis</i> MCF" | " <i>Candidatus Electrothrix japonica</i> TB" | " <i>Candidatus Electrothrix marina</i> A2" | " <i>Candidatus Electrothrix marina</i> A3" | " <i>Candidatus Electrothrix palustris</i> F3" | " <i>Candidatus Electronema palustris</i> F4" | " <i>Desulfobulbus elongatus</i> japonicus" | " <i>Desulfobulbus Desulfobulbus mediterraneus</i> " |       |       |       |   |
| " <i>Candidatus Electrothrix communis</i> A1"      | *                                             | 1,000                                         | 1,000                                         | 1,000                                          | 1,000                                          | 1,000                                          | 1,000                                          | 0.914                                          | 0.875                                         | 0.895                                       | 0.896                                       | 0.893                                          | 0.758                                         | 0.774                                       | 0.755                                                | 0.763 | 0.756 | 0.775 |   |
| " <i>Candidatus Electrothrix communis</i> N2"      | 1,137                                         | *                                             | 1,000                                         | 1,000                                          | 1,000                                          | 1,000                                          | 1,000                                          | 0.922                                          | 0.881                                         | 0.898                                       | 0.900                                       | 0.901                                          | 0.758                                         | 0.791                                       | 0.770                                                | 0.770 | 0.771 | 0.786 |   |
| " <i>Candidatus Electrothrix communis</i> N3"      | 1,137                                         | 1,137                                         | *                                             | 1,000                                          | 1,000                                          | 1,000                                          | 1,000                                          | 0.914                                          | 0.875                                         | 0.895                                       | 0.896                                       | 0.893                                          | 0.758                                         | 0.774                                       | 0.755                                                | 0.763 | 0.756 | 0.775 |   |
| " <i>Candidatus Electrothrix communis</i> USS"     | 1,137                                         | 2,124                                         | 1,137                                         | *                                              | 1,000                                          | 1,000                                          | 1,000                                          | 0.924                                          | 0.884                                         | 0.901                                       | 0.904                                       | 0.901                                          | 0.758                                         | 0.794                                       | 0.772                                                | 0.772 | 0.775 | 0.790 |   |
| " <i>Candidatus Electrothrix communis</i> US1"     | 1,137                                         | 2,124                                         | 1,137                                         | 2,364                                          | *                                              | 1,000                                          | 1,000                                          | 0.924                                          | 0.886                                         | 0.902                                       | 0.904                                       | 0.901                                          | 0.758                                         | 0.796                                       | 0.774                                                | 0.774 | 0.777 | 0.792 |   |
| " <i>Candidatus Electrothrix communis</i> US2"     | 1,062                                         | 1,509                                         | 1,062                                         | 1,749                                          | 1,800                                          | *                                              | 1,000                                          | 0.920                                          | 0.884                                         | 0.904                                       | 0.906                                       | 0.902                                          | 0.755                                         | 0.798                                       | 0.774                                                | 0.778 | 0.776 | 0.798 |   |
| " <i>Candidatus Electrothrix communis</i> US4"     | 1,137                                         | 2,124                                         | 1,137                                         | 2,364                                          | 2,415                                          | 1,800                                          | *                                              | 0.924                                          | 0.886                                         | 0.902                                       | 0.904                                       | 0.901                                          | 0.758                                         | 0.796                                       | 0.774                                                | 0.774 | 0.777 | 0.792 |   |
| " <i>Candidatus Electrothrix aarhusiensis</i> MCF" | 1,137                                         | 2,124                                         | 1,137                                         | 2,364                                          | 2,415                                          | 1,800                                          | 2,415                                          | *                                              | 0.894                                         | 0.918                                       | 0.919                                       | 0.913                                          | 0.802                                         | 0.779                                       | 0.774                                                | 0.774 | 0.778 | 0.787 |   |
| " <i>Candidatus Electrothrix japonica</i> TB"      | 1,137                                         | 2,124                                         | 1,137                                         | 2,364                                          | 2,415                                          | 1,800                                          | 2,415                                          | *                                              | 0.885                                         | 0.886                                       | 0.886                                       | 0.886                                          | 0.769                                         | 0.791                                       | 0.768                                                | 0.765 | 0.775 | 0.789 |   |
| " <i>Candidatus Electrothrix marina</i> A2"        | 1,086                                         | 2,073                                         | 1,086                                         | 2,313                                          | 2,364                                          | 1,749                                          | 2,364                                          | 2,364                                          | 2,364                                         | *                                           | 0.997                                       | 0.996                                          | 0.811                                         | 0.816                                       | 0.786                                                | 0.778 | 0.771 | 0.789 |   |
| " <i>Candidatus Electrothrix marina</i> A5"        | 1,137                                         | 2,124                                         | 1,137                                         | 2,364                                          | 2,364                                          | 1,749                                          | 2,364                                          | 2,364                                          | 2,364                                         | 2,313                                       | *                                           | 0.999                                          | 0.808                                         | 0.815                                       | 0.787                                                | 0.778 | 0.772 | 0.789 |   |
| " <i>Candidatus Electrothrix marina</i> A3"        | 792                                           | 1,779                                         | 792                                           | 1,779                                          | 1,779                                          | 1,236                                          | 1,779                                          | 1,779                                          | 1,779                                         | 1,734                                       | *                                           | 0.802                                          | 0.813                                         | 0.794                                       | 0.788                                                | 0.781 | 0.795 | 0.795 |   |
| " <i>Candidatus Electronema palustris</i> F3"      | 588                                           | 588                                           | 588                                           | 588                                            | 588                                            | 210                                            | 588                                            | 588                                            | 588                                           | 588                                         | 342                                         | *                                              | 1,000                                         | 0.732                                       | 0.758                                                | 0.702 | 0.736 | 0.736 |   |
| " <i>Candidatus Electronema palustris</i> F4"      | 1,137                                         | 2,124                                         | 1,137                                         | 2,364                                          | 2,415                                          | 1,800                                          | 2,415                                          | 2,415                                          | 2,415                                         | 2,364                                       | 1,779                                       | 588                                            | *                                             | 0.783                                       | 0.788                                                | 0.736 | 0.767 | 0.767 |   |
| <i>Desulfobulbus propionicus</i>                   | 1,137                                         | 1                                             | 1,137                                         | 2,364                                          | 2,415                                          | 1,800                                          | 2,415                                          | 2,415                                          | 2,415                                         | 2,364                                       | 1,779                                       | 588                                            | 2,415                                         | *                                           | 0.870                                                | 0.793 | 0.827 | 0.827 |   |
| <i>Desulfobulbus elongatus</i>                     | 1,137                                         | 2,124                                         | 1,137                                         | 2,364                                          | 2,415                                          | 1,800                                          | 2,415                                          | 2,415                                          | 2,415                                         | 2,364                                       | 1,779                                       | 588                                            | 2,415                                         | *                                           | 0.870                                                | 0.793 | 0.817 | 0.817 |   |
| <i>Desulfobulbus japonicus</i>                     | 1,137                                         | 2,124                                         | 1,137                                         | 2,364                                          | 2,415                                          | 1,800                                          | 2,415                                          | 2,415                                          | 2,415                                         | 2,364                                       | 1,779                                       | 588                                            | 2,415                                         | *                                           | 0.822                                                | 0.822 | 0.822 | 0.822 |   |
| <i>Desulfobulbus mediterraneus</i>                 | 1,137                                         | 2,124                                         | 1,137                                         | 2,364                                          | 2,415                                          | 1,800                                          | 2,415                                          | 2,415                                          | 2,415                                         | 2,364                                       | 1,779                                       | 588                                            | 2,415                                         | 2,421                                       | 2,421                                                | 2,421 | 2,421 | *     | * |

## Supplementary Figures

**Figure S1.** Phase contrast image of the single cable bacterium displayed in Figure 2E (insert) as proof of the different cell diameters within the same filament. At the two ends, the width changes distinctly, from 4  $\mu\text{m}$  to 8  $\mu\text{m}$ . The filament was extracted from Aarhus Bay marine sediment, with a total length exceeding 1.5 cm. Scale bar, 10  $\mu\text{m}$ .

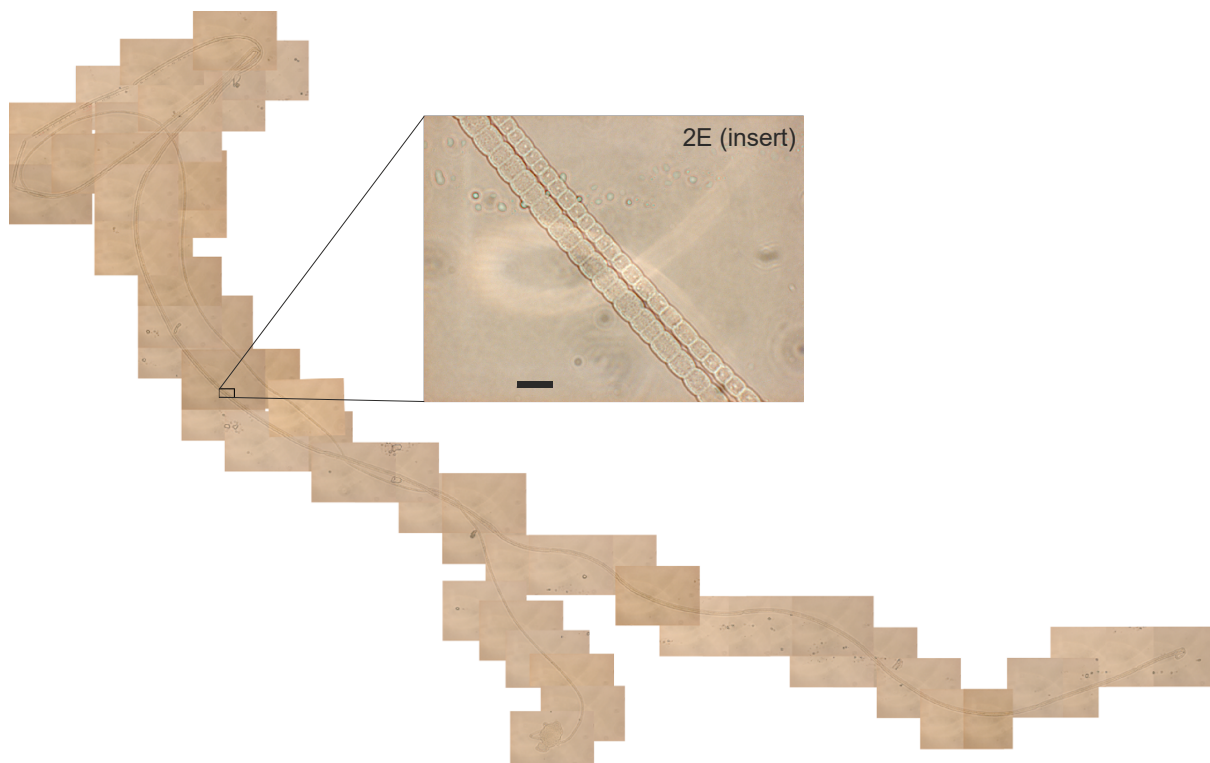

Supplement: mmc1.pdf [file mmc1.pdf]
